# Supplementary material
Source: PubMed Central journal article supplement (PMC2850795)
Supplement: mcq011_1.pdf [file mcq011_1.pdf]

## SUPPLEMENTARY DATA

FIG. S1. Intrafamilial variation in stomatal length: comparing values from different life-history groupings.

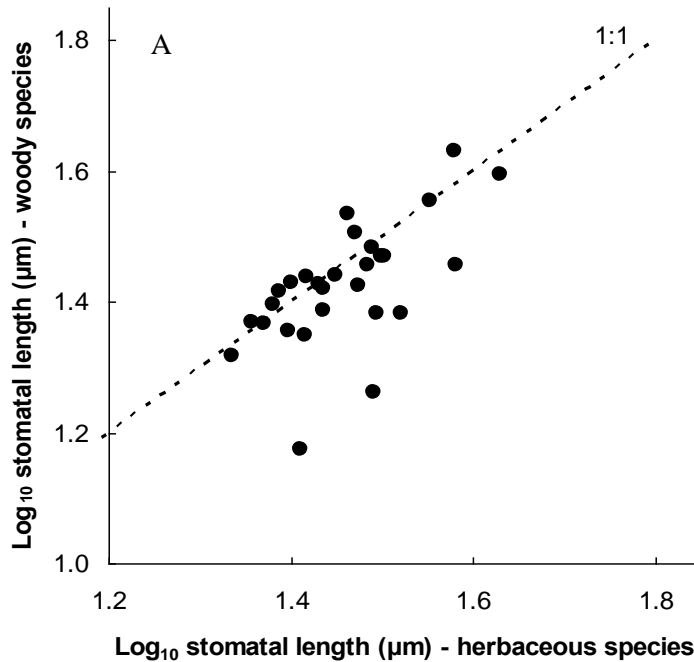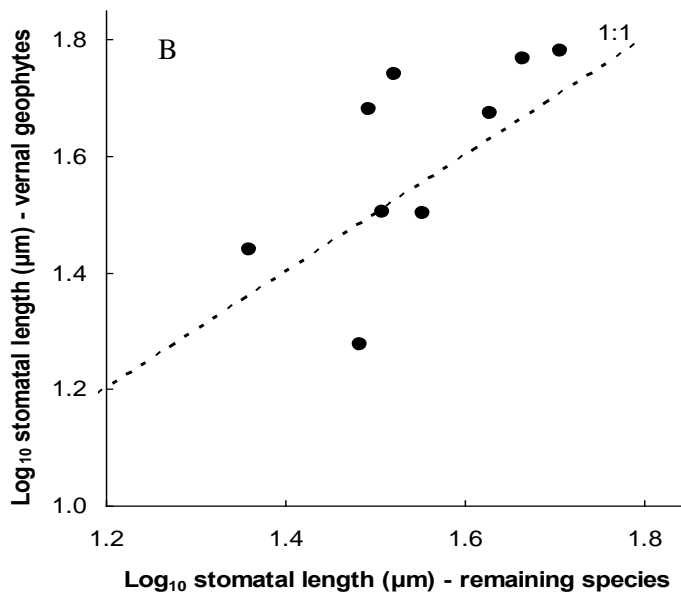

Values used were average stomatal length for each intrafamilial life-history grouping and each graphical data point represents a family. To assess whether familial stomatal size was similarly expressed within different life-history groupings, values for Pearson correlation coefficient are presented. Similarly, to evaluate whether a particular life-history was associated with higher or lower values than expected, the results of a paired  $t$ -test are also given. (A) Herbaceous (excluding vernal geophytes)  $\nu$  woody species  $r = 0.63$ ,  $P < 0.001$ ,  $n = 28$ ; paired  $t = 2.4$ ,  $P < 0.05$ . (B) Vernal geophytes  $\nu$  other species  $r = 0.68$ ,  $P < 0.05$ ,  $n = 9$ ; paired  $t = 1.2$ , ns.

FIG. S2. Intraspecific variation in stomatal length: comparing values from different countries. Similarity was assessed with Pearson correlation coefficient; *t*-test identified consistent geographical differences. (A) Spain vs UK:  $r = 0.81$ ,  $P < 0.001$ ,  $n = 123$ ; paired  $t = 0.3$ , ns. (B) UK vs Iran:  $r = 0.78$ ,  $P < 0.001$ ,  $n = 90$ ; paired  $t = 1.7$ , ns. (C) Spain vs Iran:  $r = 0.66$ ,  $P < 0.001$ ,  $n = 41$ ; paired  $t = 1.40$ , ns.

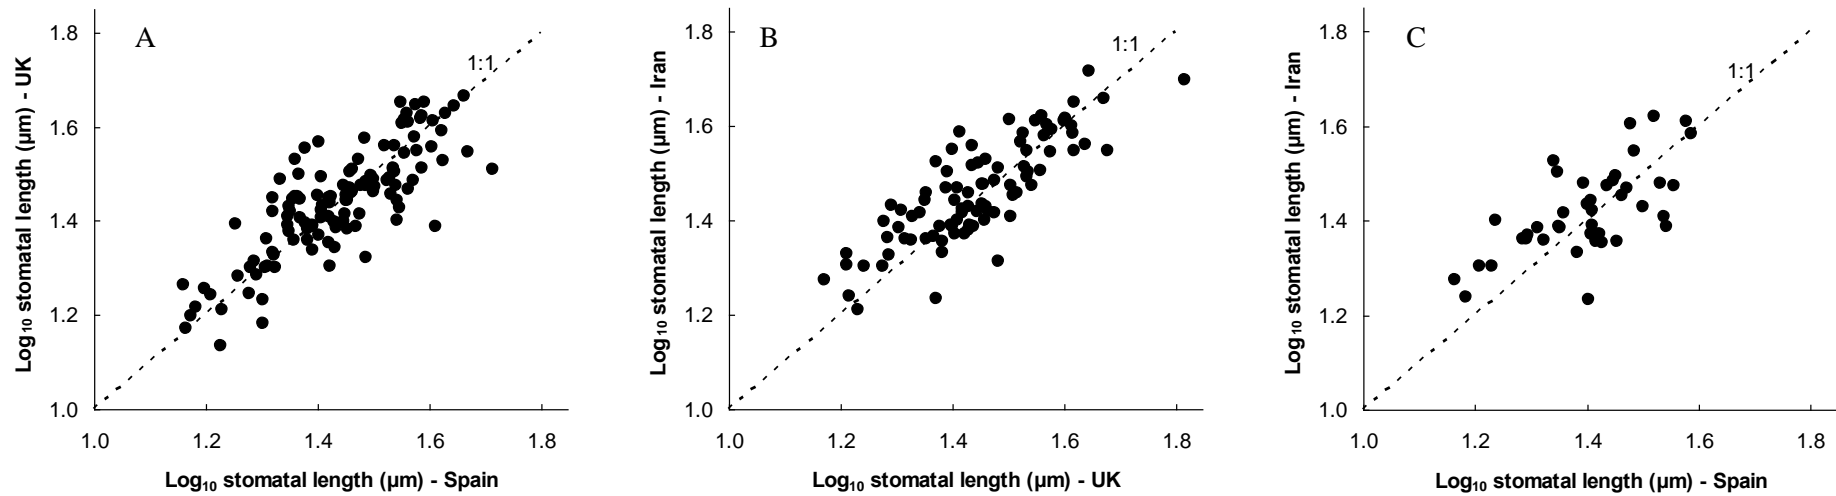

## SUPPLEMENTARY DATA

TABLE S1. A regional comparison of stomatal length distribution within different life-history classes. Species groupings with the same letters are not statistically significantly different at  $P < 0.05$  in Tukey (post-hoc) tests. Poorly represented life-histories ( $n < 10$ ) are given in parentheses.

| Life-history                    | England  |                                                 | Argentina |                                                 | Iran     |                                                 | Spain    |                                                 |
|---------------------------------|----------|-------------------------------------------------|-----------|-------------------------------------------------|----------|-------------------------------------------------|----------|-------------------------------------------------|
|                                 | <i>n</i> | Log <sub>10</sub> guard cell length ± s.d. (µm) | <i>n</i>  | Log <sub>10</sub> guard cell length ± s.d. (µm) | <i>n</i> | Log <sub>10</sub> guard cell length ± s.d. (µm) | <i>n</i> | Log <sub>10</sub> guard cell length ± s.d. (µm) |
| Woody polycarpic perennial      | 79       | 1.44 ± 0.11 <sup>ab</sup>                       | 27        | 1.38 ± 0.09 <sup>a</sup>                        | 62       | 1.42 ± 0.08 <sup>a</sup>                        | 58       | 1.39 ± 0.13 <sup>a</sup>                        |
| Monocarpic perennial            | 50       | 1.45 ± 0.10 <sup>ab</sup>                       | 1         | 1.57                                            | 22       | 1.41 ± 0.08 <sup>a</sup>                        | 18       | 1.42 ± 0.09 <sup>ab</sup>                       |
| Annual                          | 210      | 1.44 ± 0.11 <sup>a</sup>                        | 6         | 1.47 ± 0.14                                     | 95       | 1.45 ± 0.11 <sup>ab</sup>                       | 128      | 1.44 ± 0.11 <sup>b</sup>                        |
| Herbaceous polycarpic perennial | 402      | 1.47 ± 0.11 <sup>b</sup>                        | 20        | 1.39 ± 0.11 <sup>a</sup>                        | 258      | 1.47 ± 0.1 <sup>b</sup>                         | 70       | 1.46 ± 0.11 <sup>b</sup>                        |
| Vernal geophyte                 | 35       | 1.70 ± 0.16                                     | –         |                                                 | 10       | 1.67 ± 0.12                                     | 4        | 1.54 ± 0.16                                     |
|                                 |          | $F_{4,771} = 41.6, P < 0.001$                   |           | $F_{3,50} = 2.1, \text{n.s.}$                   |          | $F_{4,442} = 14.6, P < 0.001$                   |          | $F_{4,273} = 4.1, P < 0.01$                     |

TABLE S2. Familial summary of stomatal length values. Families have been phylogenetically ordered as recommended by Haston *et al.* (2007, 2009).

| Family           | Log <sub>10</sub> stomatal length (μm) |      |      |       | n   | % with nuclear DNA values |
|------------------|----------------------------------------|------|------|-------|-----|---------------------------|
|                  | Mean ± sd                              | Min. | Max. | Range |     |                           |
| Nymphaeaceae     | 1.39 ± 0.03                            | 1.37 | 1.42 | 0.05  | 2   | 100                       |
| Lauraceae        | 1.5                                    | –    | –    | –     | 1   | 100                       |
| Acoraceae        | 1.29                                   | –    | –    | –     | 1   | 100                       |
| Araceae          | 1.7                                    | –    | –    | –     | 1   | 100                       |
| Alismataceae     | 1.65 ± 0.14                            | 1.50 | 1.77 | 0.27  | 3   | 67                        |
| Butomaceae       | 1.73                                   | –    | –    | –     | 1   | 100                       |
| Juncaginaceae    | 1.62                                   | –    | –    | –     | 1   | 0                         |
| Potamogetonaceae | 1.47 ± 0.02                            | 1.45 | 1.48 | 0.03  | 2   | 50                        |
| Nartheceae       | 1.34                                   | –    | –    | –     | 1   | 100                       |
| Dioscoreaceae    | 1.42                                   | –    | –    | –     | 1   | 0                         |
| Liliaceae        | 1.94 ± 0.06                            | 1.88 | 2.00 | 0.12  | 3   | 100                       |
| Orchidaceae      | 1.76 ± 0.06                            | 1.64 | 1.88 | 0.23  | 20  | 5                         |
| Hypoxidaceae     | 1.59                                   | –    | –    | –     | 1   | 0                         |
| Iridaceae        | 1.43 ± 0.11                            | 1.28 | 1.52 | 0.24  | 4   | 0                         |
| Xanthorrhoeaceae | 1.49                                   | –    | –    | –     | 1   | 0                         |
| Amaryllidaceae   | 1.51 ± 0.08                            | 1.32 | 1.60 | 0.28  | 10  | 60                        |
| Asparagaceae     | 1.62 ± 0.12                            | 1.47 | 1.81 | 0.34  | 9   | 44                        |
| Typhaceae        | 1.3 ± 0.03                             | 1.27 | 1.33 | 0.06  | 3   | 33                        |
| Juncaceae        | 1.51 ± 0.08                            | 1.37 | 1.61 | 0.24  | 10  | 60                        |
| Cyperaceae       | 1.51 ± 0.1                             | 1.29 | 1.70 | 0.41  | 44  | 9                         |
| Poaceae          | 1.5 ± 0.13                             | 1.18 | 1.74 | 0.56  | 147 | 59                        |
| Papaveraceae     | 1.48 ± 0.08                            | 1.36 | 1.68 | 0.32  | 22  | 32                        |
| Berberidaceae    | 1.53 ± 0.17                            | 1.41 | 1.79 | 0.38  | 4   | 25                        |
| Ranunculaceae    | 1.64 ± 0.11                            | 1.33 | 1.82 | 0.48  | 37  | 62                        |
| Buxaceae         | 1.53                                   | –    | –    | –     | 1   | 100                       |
| Grossulariaceae  | 1.5 ± 0.05                             | 1.47 | 1.53 | 0.06  | 2   | 0                         |
| Saxifragaceae    | 1.56 ± 0.08                            | 1.47 | 1.74 | 0.27  | 7   | 14                        |
| Crassulaceae     | 1.52 ± 0.05                            | 1.46 | 1.63 | 0.18  | 8   | 38                        |
| Vitaceae         | 1.32                                   | –    | –    | –     | 1   | 100                       |
| Geraniaceae      | 1.41 ± 0.03                            | 1.37 | 1.46 | 0.09  | 13  | 8                         |
| Lythraceae       | 1.33 ± 0.16                            | 1.17 | 1.49 | 0.32  | 3   | 33                        |
| Onagraceae       | 1.35 ± 0.08                            | 1.19 | 1.41 | 0.23  | 8   | 50                        |
| Zygophyllaceae   | 1.43 ± 0.08                            | 1.34 | 1.50 | 0.16  | 4   | 25                        |
| Fabaceae         | 1.36 ± 0.09                            | 1.10 | 1.55 | 0.46  | 119 | 39                        |
| Polygalaceae     | 1.5 ± 0.05                             | 1.45 | 1.58 | 0.13  | 4   | 0                         |
| Rosaceae         | 1.42 ± 0.08                            | 1.21 | 1.59 | 0.38  | 62  | 18                        |
| Elaeagnaceae     | 1.42                                   | –    | –    | –     | 1   | 0                         |

| Family          | Log <sub>10</sub> stomatal length (µm) |      |      |       | n  | % with nuclear DNA values |
|-----------------|----------------------------------------|------|------|-------|----|---------------------------|
|                 | Mean ± sd                              | Min. | Max. | Range |    |                           |
| Rhamnaceae      | 1.37 ± 0.06                            | 1.30 | 1.45 | 0.15  | 6  | 17                        |
| Ulmaceae        | 1.51 ± 0.02                            | 1.49 | 1.52 | 0.03  | 2  | 50                        |
| Cannabaceae     | 1.32 ± 0.04                            | 1.26 | 1.36 | 0.11  | 5  | 40                        |
| Moraceae        | 1.18                                   | –    | –    | –     | 1  | 100                       |
| Urticaceae      | 1.37 ± 0.06                            | 1.33 | 1.44 | 0.12  | 5  | 40                        |
| Cucurbitaceae   | 1.51                                   | –    | –    | –     | 1  | 0                         |
| Fagaceae        | 1.43 ± 0.04                            | 1.35 | 1.50 | 0.15  | 11 | 64                        |
| Myricaceae      | 1.19                                   | –    | –    | –     | 1  | 100                       |
| Juglandaceae    | 1.41                                   | –    | –    | –     | 1  | 0                         |
| Betulaceae      | 1.45 ± 0.08                            | 1.38 | 1.57 | 0.19  | 4  | 50                        |
| Celastraceae    | 1.53 ± 0.07                            | 1.40 | 1.69 | 0.29  | 4  | 0                         |
| Oxalidaceae     | 1.38 ± 0.07                            | 1.31 | 1.44 | 0.13  | 3  | 33                        |
| Euphorbiaceae   | 1.37 ± 0.08                            | 1.21 | 1.51 | 0.30  | 13 | 8                         |
| Linaceae        | 1.46 ± 0.11                            | 1.26 | 1.60 | 0.34  | 7  | 0                         |
| Hypericaceae    | 1.34 ± 0.09                            | 1.21 | 1.46 | 0.25  | 6  | 33                        |
| Violaceae       | 1.53 ± 0.06                            | 1.46 | 1.62 | 0.17  | 7  | 0                         |
| Salicaceae      | 1.28 ± 0.15                            | 1.08 | 1.42 | 0.34  | 5  | 40                        |
| Resedaceae      | 1.59 ± 0.06                            | 1.47 | 1.63 | 0.16  | 6  | 17                        |
| Brassicaceae    | 1.38 ± 0.07                            | 1.22 | 1.60 | 0.37  | 69 | 23                        |
| Bursaraceae     | 1.49                                   | –    | –    | –     | 1  | 0                         |
| Anacardiaceae   | 1.32 ± 0.13                            | 1.11 | 1.47 | 0.36  | 6  | 17                        |
| Sapindaceae     | 1.34 ± 0.06                            | 1.23 | 1.42 | 0.19  | 7  | 29                        |
| Simaroubaceae   | 1.46                                   | –    | –    | –     | 1  | 0                         |
| Rutaceae        | 1.53                                   | –    | –    | –     | 1  | 100                       |
| Malvaceae       | 1.43 ± 0.12                            | 1.31 | 1.69 | 0.38  | 9  | 22                        |
| Thymelaeaceae   | 1.41 ± 0.11                            | 1.31 | 1.52 | 0.21  | 3  | 0                         |
| Cistaceae       | 1.43 ± 0.09                            | 1.23 | 1.59 | 0.35  | 11 | 18                        |
| Santalaceae     | 1.56 ± 0.02                            | 1.55 | 1.57 | 0.02  | 2  | 0                         |
| Loranthaceae    | 1.54                                   | –    | –    | –     | 1  | 100                       |
| Frankeniaceae   | 1.43 ± 0.02                            | 1.42 | 1.44 | 0.02  | 2  | 0                         |
| Tamaricaceae    | 1.33                                   | –    | –    | –     | 1  | 0                         |
| Plumbaginaceae  | 1.5 ± 0.08                             | 1.42 | 1.56 | 0.14  | 3  | 33                        |
| Polygonaceae    | 1.5 ± 0.09                             | 1.33 | 1.68 | 0.35  | 30 | 43                        |
| Droseraceae     | 1.61                                   | –    | –    | –     | 1  | 0                         |
| Caryophyllaceae | 1.51 ± 0.07                            | 1.31 | 1.68 | 0.38  | 70 | 21                        |
| Amaranthaceae   | 1.43 ± 0.1                             | 1.12 | 1.63 | 0.51  | 30 | 33                        |
| Portulacaceae   | 1.54 ± 0.11                            | 1.33 | 1.62 | 0.29  | 6  | 50                        |
| Aizoaceae       | 1.48                                   | –    | –    | –     | 1  | 0                         |
| Cornaceae       | 1.46 ± 0.06                            | 1.41 | 1.50 | 0.09  | 2  | 100                       |
| Balsaminaceae   | 1.33 ± 0.03                            | 1.31 | 1.35 | 0.04  | 2  | 50                        |

| Family             | Log <sub>10</sub> stomatal length (μm) |             |             |             | n           | % with nuclear DNA values |
|--------------------|----------------------------------------|-------------|-------------|-------------|-------------|---------------------------|
|                    | Mean ± sd                              | Min.        | Max.        | Range       |             |                           |
| Polemoniaceae      | 1.56                                   | –           | –           | –           | 1           | 0                         |
| Primulaceae        | 1.51 ± 0.06                            | 1.38        | 1.62        | 0.24        | 14          | 21                        |
| Ericaceae          | 1.48 ± 0.06                            | 1.39        | 1.59        | 0.19        | 10          | 0                         |
| Rubiaceae          | 1.55 ± 0.06                            | 1.43        | 1.72        | 0.29        | 26          | 23                        |
| Gentianaceae       | 1.56 ± 0.05                            | 1.50        | 1.61        | 0.11        | 6           | 33                        |
| Apocynaceae        | 1.43 ± 0.1                             | 1.36        | 1.56        | 0.20        | 4           | 0                         |
| Boraginaceae       | 1.45 ± 0.09                            | 1.30        | 1.63        | 0.33        | 28          | 4                         |
| Convolvulaceae     | 1.46 ± 0.06                            | 1.36        | 1.53        | 0.17        | 8           | 25                        |
| Solanaceae         | 1.41 ± 0.07                            | 1.33        | 1.55        | 0.22        | 9           | 56                        |
| Oleaceae           | 1.43 ± 0.04                            | 1.37        | 1.49        | 0.12        | 5           | 60                        |
| Plantaginaceae     | 1.48 ± 0.08                            | 1.38        | 1.66        | 0.28        | 36          | 72                        |
| Scrophulariaceae   | 1.44 ± 0.06                            | 1.33        | 1.59        | 0.25        | 31          | 3                         |
| Lamiaceae          | 1.39 ± 0.05                            | 1.29        | 1.50        | 0.21        | 73          | 12                        |
| Orobanchaceae      | 1.44 ± 0.05                            | 1.39        | 1.53        | 0.15        | 8           | 25                        |
| Lentibulariaceae   | 1.57                                   | –           | –           | –           | 1           | 0                         |
| Bignoniaceae       | 1.42                                   | –           | –           | –           | 1           | 0                         |
| Verbenaceae        | 1.45                                   | –           | –           | –           | 1           | 0                         |
| Aquifoliaceae      | 1.61                                   | –           | –           | –           | 1           | 100                       |
| Campanulaceae      | 1.51 ± 0.06                            | 1.41        | 1.61        | 0.20        | 9           | 0                         |
| Menyanthaceae      | 1.59                                   | –           | –           | –           | 1           | 0                         |
| Asteraceae         | 1.47 ± 0.09                            | 1.24        | 1.85        | 0.61        | 162         | 31                        |
| Adoxaceae          | 1.72 ± 0.07                            | 1.66        | 1.77        | 0.10        | 2           | 100                       |
| Caprifoliaceae     | 1.49 ± 0.07                            | 1.33        | 1.61        | 0.28        | 27          | 11                        |
| Araliaceae         | 1.47                                   | –           | –           | –           | 1           | 100                       |
| Apiaceae           | 1.42 ± 0.09                            | 1.21        | 1.66        | 0.45        | 67          | 21                        |
| <b>All species</b> | <b>1.46 ± 0.12</b>                     | <b>1.08</b> | <b>2.00</b> | <b>0.92</b> | <b>1442</b> | <b>31</b>                 |
